# Supplementary material
Source: publisher figshare collection journal article supplement (https://tandf.figshare.com/ndownloader/files/18714737)
Supplement: Supplementary file 1 [file 18714737]

**SUPPORTING INFORMATION FOR**

**Modelling peak exposure of pesticides in terrestrial and aquatic ecosystems: importance of dissolved organic carbon and vertical particle movement in soil**

Elisa Terzaghi, Chiara Maria Vitale^ and Antonio Di Guardo[[1]](#footnote-1)*

Department of Science and High Technology (DiSAT), University of Insubria, Via Valleggio 11, Como, Italy

[S1 – Materials and methods 2](#_Toc20674752)

[Figure S1-Pesticide application, rainfall event and infiltration/runoff water (sl1) 3](#_Toc20674753)

[S2 – Results 4](#_Toc20674754)

[Figure S2-Chemical partitioning in the soil water phase (1st layer) (concentrations mol/m3) 4](#_Toc20674755)

S1 – Materials and methods

Figure S1-Pesticide application, rainfall event and infiltration/runoff water (sl1)

S2 – Results

Figure S2-Chemical partitioning in the soil water phase (1st layer) (concentrations mol/m3)

1. * Corresponding author e-mail: antonio.diguardo@uninsubria.it

   ^ Current address of CMV is RECETOX (Research Center for Toxic Compounds in the Environment), Kamenice 753/5, 625 00, Brno [↑](#footnote-ref-1)
